RESEARCH ARTICLE

# The MD Blues: Under-Recognized Depression and Anxiety in Medical Trainees

Omar Y. Mousa<sup>1\*</sup>, Mandip S. Dhamoon<sup>2</sup>, Sarah Lander<sup>1</sup>, Amit S. Dhamoon<sup>1</sup>

**1** Department of Medicine, State University of New York—Upstate Medical University, Syracuse, New York, United States of America, **2** Department of Neurology, Icahn School of Medicine at Mount Sinai, New York, New York, United States of America

\* [omar.mousa@hotmail.com](mailto:omar.mousa@hotmail.com)

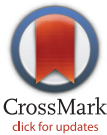

 OPEN ACCESS

**Citation:** Mousa OY, Dhamoon MS, Lander S, Dhamoon AS (2016) The MD Blues: Under-Recognized Depression and Anxiety in Medical Trainees. PLoS ONE 11(6): e0156554. doi:10.1371/journal.pone.0156554

**Editor:** Delphine S. Courvoisier, University of Geneva, SWITZERLAND

**Received:** January 2, 2016

**Accepted:** May 16, 2016

**Published:** June 10, 2016

**Copyright:** © 2016 Mousa et al. This is an open access article distributed under the terms of the [Creative Commons Attribution License](https://creativecommons.org/licenses/by/4.0/), which permits unrestricted use, distribution, and reproduction in any medium, provided the original author and source are credited.

**Data Availability Statement:** All relevant data are within the paper and its Supporting Information files.

**Funding:** The authors received no specific funding for this work.

**Competing Interests:** The authors have declared that no competing interests exist.

**Abbreviations:** MS, Medical students; MDD, Major depressive disorder; GAD, Generalized anxiety disorder; PHQ-2, Patient Health Questionnaire 2; ACGME, Accreditation Council for Graduate Medical Education; LCME, The Liaison Committee on Medical Education.

## Abstract

### Background

Mental health disease is under recognized in medical professionals.

### Objective

To screen medical students (MS), residents and fellows for major depressive disorder (MDD) and generalized anxiety disorder (GAD) under the new era of work hour reform with age-matched controls from a large representative cross-sectional survey.

### Methods

We conducted an anonymous online survey at a medical university in 2013–2014. We incorporated the Patient Health Questionnaire 2 (PHQ-2) to screen for MDD and the generalized anxiety disorder scale (GAD-7) to screen for GAD, along with additional questions on life stressors and academic performance. We compared these results to age-matched controls from the National Health and Nutrition Examination Survey (NHANES) database.

### Results

126 residents/fellows and 336 medical students participated voluntarily. 15.1% and 15.9% of postgraduates as well as 16.4% and 20.3% of MS screened positive for MDD and GAD, respectively. When compared to national estimates, the prevalence of a positive screen for MDD was over five-fold higher in medical trainees compared to age-matched controls (16% vs. 2.8%,  $p < 0.0001$ ). Similarly, the prevalence of a positive screen for GAD was over eight-fold higher in medical trainees (19% vs. 2.3%,  $p < 0.0001$ ). The prevalence was consistently higher within age strata. 33.3% of postgraduates and 32% of MS believe there is a significant impact of depression or anxiety on their academic performance. For stress relief, one fifth of residents/fellows as well as MS reported alcohol use.

### Conclusions

The stresses of medical education and practice may predispose trainees to psychopathological consequences that can affect their academic performance and patient care. The

current study showed a significantly higher rate of MDD and GAD positive screens in medical trainees than the prevalence in an age-matched U.S. population, despite significant work hour reform for medical trainees. Increased awareness and support services are required at all levels of medical training. We propose that the ACGME and the Institute of Medicine may consider these findings when implementing future changes to work hour regulations.

---

## Introduction

The World Health Organization has ranked depression as the fourth leading cause of disability worldwide [1]. In the U.S, Major Depressive Disorder (MDD) affects 14.8 million (6.7%) adults every year. In addition, 6.8 million Americans (3.1%) are affected by general anxiety disorder (GAD) [2]. The financial and societal consequences of MDD [3] and GAD include absenteeism, reduced life satisfaction, and reduced health related quality of life. The medical profession is charged with diagnosing and treating these disorders in our patients, however the mental health of medical providers has not been well studied [4].

Psychological distress among physicians was found to originate in the early years of medical school and persist throughout their careers [5]. The mental health of physicians is often discussed in terms of job satisfaction, well-being, burnout, depression, or anxiety. Depression, anxiety and mental distress affect can directly impact patient care [6]. Higher rates of depression have been found among residents who self report medical errors [7]. Medical trainees have higher rates of suicidal ideation and suicide attempts compared to the general population [8]. Alarming, on average, one physician commits suicide every day in the US [9].

The Accreditation Council for Graduate Medical Education (ACGME) oversees the training of all medical and surgical residents and fellows in the United States. In the last decade, there has been increasing oversight and enforcement of work hour regulations, standards for attending supervision, and management of fatigue. In 2011 the ACGME enacted work hour restrictions [10] in order to mitigate fatigue, enhance quality of life, and increase patient safety. In addition, in November 2015, the ACGME sponsored a two day symposium of “Physician Well-Being” to address the health of medical trainees, faculty, and practitioners.

In our study, we focus on screening of depression and anxiety in medical trainees compared to the general population. We postulate that anxiety and depression are under recognized in medical trainees and we aim to evaluate the rates of these disorders in an era of increasing administrative oversight. Our research screened for generalized anxiety disorder and major depressive disorder among medical students, residents, and fellows in one academic institution and compared these results to screening tests from a large cross-sectional study in the United States. Secondary goals included identification of potential risk factors and coping strategies.

## Methods

### Study population

We surveyed all medical students in the College of Medicine (years 1–4; 643) and medical residents/fellows (post-graduate years 1–7 from all medical specialties; 516) at a University-based program in New York. Invitations to participate in this study were distributed between October–November 2013 for MSs and September–October 2014 for the residents/fellows.

## Materials and Data Collection

This project was deemed exempt from review by the State University of New York–Upstate institutional review board on October 17, 2013 according to federal regulations. An anonymous, voluntary online survey was electronically mailed through the graduate medical education office. See appendix A for a copy of the survey. The hypothesis of the study was not released to the participants. Trainees were not asked to report their past medical history or their medications.

## Survey Measures

The patient Health Questionnaire-2 (PHQ-2; score 0–6) is a validated screening tool for MDD (optimal cutoff score for a positive screen is  $\geq 3$ , specificity 92%—sensitivity 83%). [11]. The generalized anxiety disorder scale (GAD-7; score 0–21) was used to screen for anxiety (positive screen for moderate to severe anxiety is a cutoff score  $\geq 10$ , sensitivity 89%—specificity 82%) [12]. We incorporated these two scales in our survey “S1 Table”, and included questions on demographics, academic performance, and coping strategies.

## Comparison to National Estimates

The National Health and Nutrition Examination Survey (NHANES) is a large, nationally representative cross-sectional survey conducted in 2-year cycles in the U.S., focusing on health conditions and behaviors, diet, physical examination findings, and laboratory results. The sampling methodology seeks to create nationally representative estimates for the non-military, non-institutionalized U.S. population. Evaluations included interviews and mental health questionnaires. The design and methods of NHANES have been described elsewhere [11]. Written informed consent was obtained from all participants by the NHANES study, and the study was reviewed by the CDC/National Center for Health Statistics. For the comparison to national depression estimates, data were obtained from the survey cycle that was contemporaneous to the survey measure performed among medical students and residents (2013–2014), and data were limited to the same age range (18–45). The respondents’ actual or imputed date of birth was used to calculate age. The PHQ-2 was used to screen for depression. For the comparison to national anxiety estimates, data were obtained from all survey years in which anxiety was assessed (1999–2004). The anxiety measure, derived from the World Health Organization Composite International Diagnostic Interview, Version 2.1, was assessed only among ages 20–39 years.

## Statistical Analysis

The distributions of scores on the PHQ-2 and GAD-7 screening tools were represented in bar graphs. Within the study population, a positive screen for depression was defined as a PHQ-2 score of  $\geq 3$ , and a positive screen for anxiety was defined as a GAD-7 score of  $\geq 10$ . Distributions of characteristics of the survey population were summarized, including demographics and year of training. Then, the prevalence of a positive screen of depression was compared by levels of age, sex, and ethnicity, using a Fisher’s exact test for significance. The prevalence of anxiety was similarly compared. Then, the prevalence of a positive screen for depression was compared between the study population of medical trainees and the nationally-representative NHANES cohort, using a chi-square test for significance. Comparisons were performed among the entire age range of the study population, as well as within age strata (ages 18–24, 25–30, 31–35, and 36–45 years). A similar comparison was performed for a positive screen for anxiety between the study population and the NHANES cohort. All two-tailed *P* values of less than

0.05 were considered significant. Data analysis was performed using the Statistical Package for the Social Sciences (SPSS) v19 and SAS version 9.4.

## Results

Three hundred and thirty six (52.3%) of MS and 126(24.4%) of medical residents/fellows completed the survey. Characteristics of the combined cohort are shown in “Table 1”. There were no significant differences in the prevalence of positive screens for depression or anxiety within levels of age, sex, or race/ethnicity (results not shown). In the study population, distributions of scores are shown in “Fig 1A (PHQ-2) and Fig 2 (GAD-7)”, and the distribution of PHQ-2 scores in NHANES is shown in “Fig 2B”. Thirty-six students did not complete the GAD-7 part of the survey.

Among MS, 16.4% (55/336) and 20.3% (61/300) had a positive screen for depression and GAD, respectively. Thirty-two percent (96/300) of MS believed there is a significant impact of depression or anxiety on their academic performance. While the majority of MS deal with stress by physical exercise or talking to friends, 20% (60/300) reported that they use alcohol for stress relief and 4% (12/300) use tobacco “Table 2”. As a response to an open-ended question, 11% (33/300) talked to a counselor, 5.3% (16/300) sought psychiatric help and 9% (27/300) used prescription medications. Attending physicians and residents were the healthcare personnel who contributed to the most stressful experiences for medical students.

**Table 1. Characteristics of the study population.**

| Variable          | Frequency, No. (%) |
|-------------------|--------------------|
| Sex:              |                    |
| Male              | 229 (49.6)         |
| Female            | 233 (50.4)         |
| Age:              |                    |
| 18–24             | 158 (34.2)         |
| 25–30             | 233 (50.4)         |
| 31–35             | 53 (11.5)          |
| 36–45             | 18 (3.9)           |
| Race/ethnicity:   |                    |
| White             | 296 (64.1)         |
| Black             | 30 (6.5)           |
| Asian             | 95 (20.6)          |
| NHPI*             | 13 (2.8)           |
| Other             | 28 (6.1)           |
| Year of training: |                    |
| MSI               | 85 (25.3)          |
| MS II             | 78 (23.2)          |
| MS III            | 81 (24.1)          |
| MS IV             | 92 (27.4)          |
| PGY-1             | 40 (31.8)          |
| PGY-2             | 30 (23.8)          |
| PGY-3             | 18 (14.3)          |
| PGY-4             | 16 (12.7)          |
| PGY-5             | 14 (11.1)          |
| PGY-6+            | 8 (6.4)            |

\*NHPI, Native Hawaiian or Pacific Islander; PGY, post-graduate year

doi:10.1371/journal.pone.0156554.t001

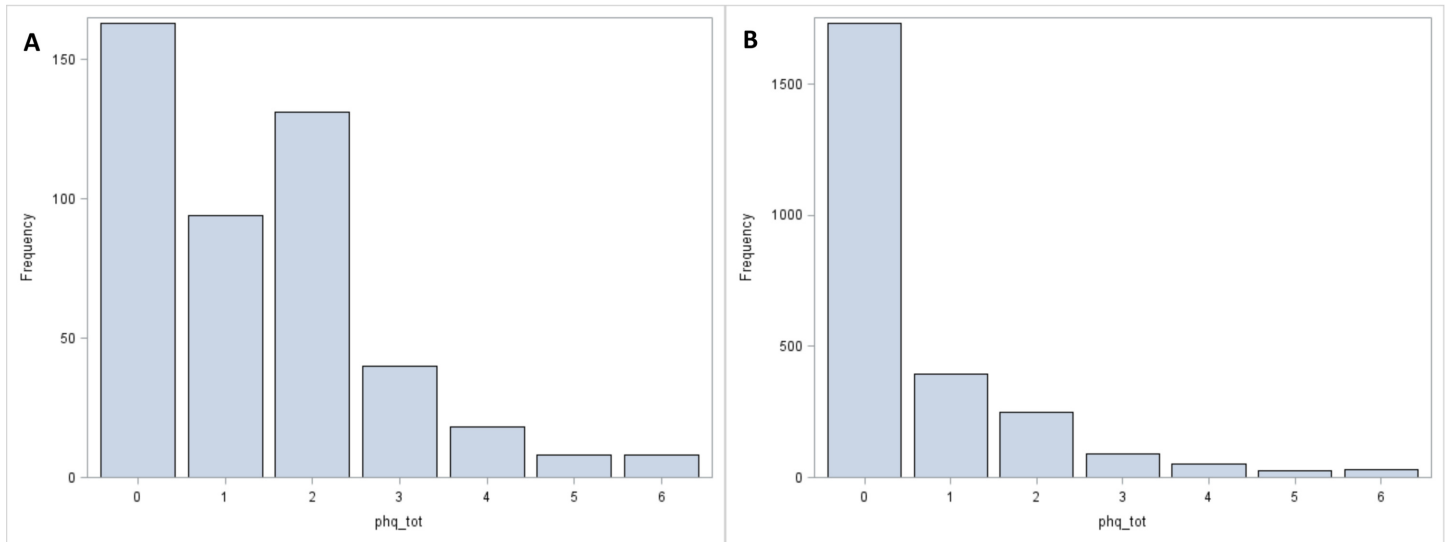

**Fig 1.** A. Distribution of PHQ-2 scores in study population. B. Distribution of PHQ-2 scores in NHANES population (ages 18–45 years).

doi:10.1371/journal.pone.0156554.g001

Residents in the first 3 years of training participated more frequently in the survey (69.8%) than the fellows. Among residents/fellows, 15.1% (19/126) and 15.9% (20/126) had a positive screen for depression and GAD, respectively. One third (42/126) believed there was a significant impact of depression or anxiety on their academic performance. One in five residents/fellows (27/126) reported the use of alcohol for stress relief and one resident admitted to the use of marijuana. Only 4% (5/126) reported that they referred to a psychiatrist when needed. They

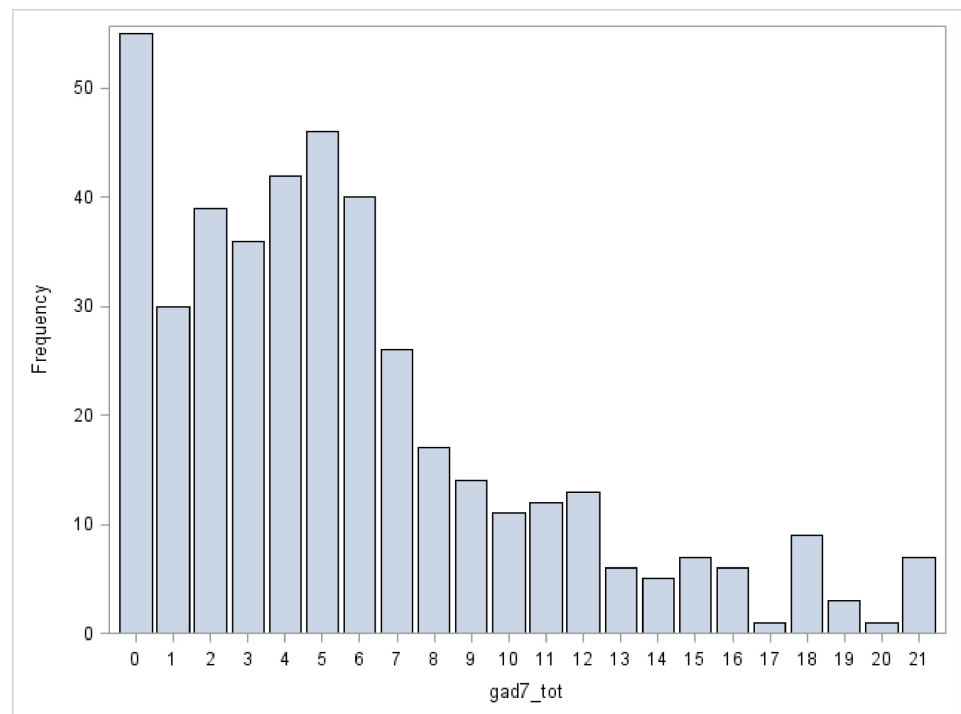

**Fig 2.** Distribution of GAD-7 scores in study population.

doi:10.1371/journal.pone.0156554.g002

**Table 2. Dealing with stress, anxiety, emotions, depression.**

| Actions*                 | Medical Students Years 1 to 4<br>N = 300 | Residents/Fellows PGY-1 to 7<br>N = 126 |
|--------------------------|------------------------------------------|-----------------------------------------|
| Talking to friends       | 235                                      | 89                                      |
| Exercise/ Sports         | 204                                      | 68                                      |
| Alcohol                  | 60                                       | 27                                      |
| Talk to a counselor      | 33                                       | 7                                       |
| Prescription Medications | 27                                       | 3                                       |
| Religion                 | 17                                       | 4                                       |
| Psychiatrist             | 16                                       | 5                                       |
| Smoking                  | 12                                       | 4                                       |
| Family/Spouse            | 12                                       | 7                                       |
| Music                    | 10                                       | 2                                       |
| Movies/TV                | 9                                        | 5                                       |
| Eating                   | 3                                        | 0                                       |
| Sleep                    | 2                                        | 7                                       |
| Video Games              | 2                                        | 0                                       |
| Baking                   | 1                                        | 0                                       |
| Yoga                     | 0                                        | 2                                       |
| Reading                  | 0                                        | 2                                       |
| Vacation                 | 0                                        | 2                                       |
| Marijuana                | 0                                        | 1                                       |
| Repression               | 0                                        | 1                                       |

\*Actions, based on responses to an open ended question.

doi:10.1371/journal.pone.0156554.t002

also reported that attending physicians (54%) and the nursing staff (38.9%) contributed to the most stressful experiences during their training “[Table 2](#)”.

When compared to national estimates, the prevalence of a positive screen for MDD was over five-fold higher in the study population (residents/fellows and MS) compared to an age-matched nationally representative cohort (16% vs. 2.8%,  $p < 0.0001$ ), and prevalence was consistently higher when examined within age strata “[Table 3](#)”. Similarly, the prevalence of a positive screen for GAD was over eight-fold higher in the study population compared to the NHANES population (19% vs. 2.3%,  $p < 0.0001$ ), and the prevalence was consistently higher within age strata “[Table 4](#)”.

## Discussion

We hypothesized that MDD and GAD are under recognized in medical trainees. Furthermore, the social stigma of depression and anxiety may complicate the diagnosis and treatment of these disorders in healthcare professionals [[13](#)]. Our results suggest that medical students, residents, and fellows have five to eight times higher rates of positive screens for depression and anxiety than the rates of these diseases in an age-matched U.S. population. We highlight the need for mental health resources for medical trainees so that our future physicians can lead productive, successful lives.

Over the last two decades there has been increasing oversight of medical training in the United States. The ACGME imposed duty hour limitations for house officers in 2003 [[14](#)] and again in 2011. Similarly, medical schools have implemented several initiatives, such as Wellness Programs in order to address the emotional and mental health of students. Our study shows

**Table 3. Comparison of positive depression screens between study population (years 2013–2014) and NHANES population (years 2013–2014).**

|                  |             | Positive depression screen (#PHQ-2 ≥ 3) |                   |          |
|------------------|-------------|-----------------------------------------|-------------------|----------|
|                  |             | No. (%)                                 |                   |          |
|                  |             | Study Population (N = 462)              | NHANES (N = 7011) | p-value  |
| Ages             | 18–45 years | 74 (16.0)                               | 198 (2.8)         | < 0.0001 |
| Age strata (yr): |             |                                         |                   |          |
|                  | 18–24       | 29 (18.4)                               | 55 (6.4)          | < 0.0001 |
|                  | 25–30       | 34 (14.6)                               | 29 (5.16)         | < 0.0001 |
|                  | 31–35       | 9 (17.0)                                | 32 (6.6)          | 0.007    |
|                  | 36–45       | 2 (11.1)                                | 82 (7.9)          | 0.6      |

#PHQ, Patient health questionnaire.

doi:10.1371/journal.pone.0156554.t003

that medical students, residents and fellows continue to have high rates of positive screens for depression and anxiety in the U.S. despite these interventions.

In a sub-analysis, there was no significant difference in age groups, gender, ethnicity or PGY level in terms of PHQ-2 or GAD-7 scores. Very few studies compared rates of depression and anxiety across different levels of medical training in the same institution. We show that preclinical medical students have higher rates of positive screens for depression and anxiety than students in the clinical years. In addition, third year medical students continue to have high rates of positive screens for anxiety. This finding highlights the early existence of these disorders in medical training, and extra attention may need to be given at this level. Another study showed the persistence of depression scores over time during medical school, suggesting that emotional distress is chronic and persistent rather than episodic [15].

As for house officers, surprisingly the residents in the first year of their training were found to have lower rates of positive screens for depression and anxiety when compared to second and third year residents. This is possibly related to increased oversight by senior residents and attending physicians with the ACGME work hour regulations. However, advanced postgraduates had higher rates of positive depression screens.

### Depression and Anxiety assessment tools

Many tools that assess for depression and anxiety symptoms or disorders have been used over the past 40 years. Previous studies used screening tools for depression that have lower

**Table 4. Comparison of positive anxiety screens between study population (years 2013–2014) and NHANES population (years 1999–2004).**

|                  |             | Positive anxiety screen                 |                             |         |
|------------------|-------------|-----------------------------------------|-----------------------------|---------|
|                  |             | No. (%)                                 |                             |         |
|                  |             | Study Population (GAD-7 ≥ 10) (N = 426) | NHANES (#CIQGAD) (N = 2221) | p-value |
| Ages             | 20–39 years | 81 (19.0)                               | 50 (2.3)                    | <0.0001 |
| Age strata (yr); |             |                                         |                             |         |
|                  | 20–24       | 32 (21.8)                               | 8 (1.34)                    | <0.0001 |
|                  | 25–30       | 40 (18.8)                               | 13 (1.9)                    | <0.0001 |
|                  | 31–35       | 9 (18.4)                                | 11 (2.1)                    | <0.0001 |
|                  | 36–39       | 0/16                                    | 18 (4.4)                    | 1.0     |

#CIQGAD, Composite Interview Questionnaire Generalized Anxiety Disorder.

doi:10.1371/journal.pone.0156554.t004

specificity [16]. While other studies reported the use of screening tools with lower diagnostic threshold as the reason behind having high rates of depression and anxiety among trainees and medical students in the US, our study showed that the rates remain high even when we used a more reliable screening tool with high specificity (PHQ-2 and GAD-7). The NHANES database also used reliable diagnostic tools for MDD and GAD, as described previously.

## Dealing with Stress

Acknowledgment and treatment of these serious illnesses in medical trainees is crucial as they ultimately impact quality of life, medical education, and patient care. Previous studies showed that seeking help either through a psychiatrist or a psychologist is minimal, and 60% of physicians with recent history of suicidal ideation were unwilling to seek help due to future career concerns [17]. Our results revealed that the rates of seeking help continue to be low, with high rates of alcohol use as a method to relief stress. These results suggest that stigmatization of mental health disorders continues to persist among healthcare providers.

## Influence on academic performance

Medical students with MDD have been reported to have significantly lower grade averages [18]. In addition, there are higher rates of perceived medical errors, actual medication errors and stress during training among those who screened positive for depression. Those residents were more likely to be dissatisfied with their medical career [19]. In our study, one third of respondents felt that there was a significant impact of depression or anxiety on their academic performance. Perhaps a multifaceted approach should be used in counseling trainees who are having academic difficulties, and exploring the psychological impact on their performance.

## Intervention

For medical trainees, stigma, mental health literacy, concerns about privacy, accessibility of services, and lack of time are barriers to seeking help [20,21]. Future studies should focus on cost-effective multidisciplinary interventions to promote trainee wellness that involves screening, increasing access to services, and support during the training period of medical professionals. Similarly, support services should be considered for medical professionals in practice.

## Limitations

We believe that our results from a single institution may be generalizable to medical trainees in University-based programs across the United States. Nevertheless, multi-institutional data may be considered in order to more completely elucidate institutional, regional, and cultural differences involved in medical training. In addition, it is important to highlight that the screening tools we used in our survey cannot confirm a diagnosis of MDD or GAD. Nevertheless, PHQ-2 and GAD-7 scales have sufficient sensitivity and specificity to be used broadly in outpatient practices across the United States. In addition, data was obtained by a voluntary survey and we were not able to obtain a 100% response rate. As with all surveys there may be response bias that can confound our data.

## Conclusion

Physicians often look at the medical school and residency training as the most emotionally draining period of their careers [22]. In an era of work hour reform, our positive screens for MDD (five times) and GAD (eight times) during medical school and residency were significantly higher than the prevalence of these diseases in the general U.S. population. Raising



awareness among medical students and trainees of the high prevalence of psychological distress and mental health issues may de-stigmatize these diagnoses and facilitate open discussion of the psychological effects of their training on their life. This may also facilitate diagnosis and treatment of depression and anxiety in our trainees. Also, an open discussion of the rigors of medical training may allow for more adaptive coping strategies during medical school and residency. We recommend screening of medical students and postgraduates periodically during training, which may be beneficial to the individual, the healthcare organization, and patients. Further studies are needed to identify personal and institutional related aspects that contribute to depression and anxiety and further explore the relationship between these stressors and academic performance.

## Supporting Information

**S1 Table. Survey.**  
(DOCX)

## Acknowledgments

We would like to thank the Department of Medicine and the office of Graduate Medical Education for assistance in completing this study.

## Author Contributions

Conceived and designed the experiments: OYM MSD SL ASD. Performed the experiments: OYM MSD SL ASD. Analyzed the data: OYM MSD SL ASD. Contributed reagents/materials/analysis tools: OYM MSD SL ASD. Wrote the paper: OYM MSD SL ASD.

## References

1. Kessler Ronald C., Bromet Evelyn J. The epidemiology of depression across cultures. *Annu Rev Public Health*. 2013; 34: 119–138. doi: [10.1146/annurev-publhealth-031912-114409](https://doi.org/10.1146/annurev-publhealth-031912-114409) PMID: PMC4100461.
2. "Facts & Statistics | Anxiety and Depression Association of America, ADAA." Facts & Statistics | Anxiety and Depression Association of America, ADAA. N.p., n.d. Web. 4 June 2014. <<http://www.adaa.org/about-adaa/press-room/facts-statistics>>.
3. Greenberg PE, Fournier AA, Sisitsky T, Pike CT, Kessler RC. The economic burden of adults with major depressive disorder in the United States (2005 and 2010). *J Clin Psychiatry*. 2015 Feb; 76(2):155–62. doi: [10.4088/JCP.14m09298](https://doi.org/10.4088/JCP.14m09298) PMID: [25742202](https://pubmed.ncbi.nlm.nih.gov/25742202/)
4. Joules N., Williams D. and Thompson A. (2014) Depression in Resident Physicians: A Systematic Review. *Open Journal of Depression*, 3, 89–100. doi: [10.4236/ojd.2014.33013](https://doi.org/10.4236/ojd.2014.33013)
5. Dyrbye LN, Thomas MR, Shanafelt TD. Systematic review of depression, anxiety, and other indicators of psychological distress among U.S. and Canadian medical students. *Acad Med*. 2006 Apr; 81(4):354–73. PMID: [16565188](https://pubmed.ncbi.nlm.nih.gov/16565188/)
6. Saipanish R. Stress among medical students in a Thai medical school. *Med Teacher* 2003; 25 (5):502–6.
7. West CP, Tan AD, Habermann TM, Sloan JA, Shanafelt TD. Association of resident fatigue and distress with perceived medical errors. *JAMA*. 2009 Sep 23; 302(12):1294–300. doi: [10.1001/jama.2009.1389](https://doi.org/10.1001/jama.2009.1389) PMID: [19773564](https://pubmed.ncbi.nlm.nih.gov/19773564/)
8. Lindeman S, Laara E, Hakko H, Lonnqvist J. A systematic review on gender-specific suicide mortality in medical doctors. *Br J Psychiatry* 1996; 168:274–93. PMID: [8833679](https://pubmed.ncbi.nlm.nih.gov/8833679/)
9. <https://www.afsp.org/preventing-suicide/our-education-and-prevention-programs/programs-for-professionals/physician-and-medical-student-depression-and-suicide/facts-about-physician-depression-and-suicide>.
10. Drolet Brian C., Spalluto Lucy B., Fischer Staci A. Residents' Perspectives on ACGME Regulation of Supervision and Duty Hours—A National Survey. *N Engl J Med* 2010; 363:e34 December 2, 2010 doi: [10.1056/NEJMp1011413](https://doi.org/10.1056/NEJMp1011413)

11. Kroenke K, Spitzer RL, Williams JB. The Patient Health Questionnaire-2: Validity of a Two-Item Depression Screener. *Medical Care* 2003, (41: ) 1284–1294.
12. Spitzer RL, Kroenke K, Williams JBW, Lowe B. A brief measure for assessing generalized anxiety disorder. *Arch Intern Med*. 2006; 166:1092–1097.
13. Schwenk TL, Davis L, Wimsatt LA. Depression, stigma, and suicidal ideation in medical students. *JAMA*. 2010 Sep 15; 304(11):1181–90. doi: [10.1001/jama.2010.1300](https://doi.org/10.1001/jama.2010.1300) PMID: [20841531](https://pubmed.ncbi.nlm.nih.gov/20841531/)
14. Philibert I, Friedmann P, Williams WT. ACGME Work Group on Resident Duty Hours. Accreditation Council for Graduate Medical Education. New requirements for resident duty hours. *JAMA*. 2002 Sep 4; 288(9):1112–4. PMID: [12204081](https://pubmed.ncbi.nlm.nih.gov/12204081/)
15. Rosal MC, Ockene IS, Ockene JK, Barrett SV, Ma Y, Hebert JR. A longitudinal study of students' depression at one medical school. *Acad Med*. 1997 Jun; 72(6):542–6. PMID: [9200590](https://pubmed.ncbi.nlm.nih.gov/9200590/)
16. Dyrbye LN, West CP, Satele D, Boone S, Tan L, Sloan J, Shanafelt TD. Burnout among U.S. medical students, residents, and early career physicians relative to the general U.S. population. *Acad Med*. 2014 Mar; 89(3):443–51. doi: [10.1097/ACM.0000000000000134](https://doi.org/10.1097/ACM.0000000000000134) PMID: [24448053](https://pubmed.ncbi.nlm.nih.gov/24448053/)
17. Shanafelt TD, Balch CM, Dyrbye L, Bechamps G, Russell T, Satele D, Rummans T, et al. Special report: suicidal ideation among American surgeons. *Arch Surg*. 2011 Jan; 146(1):54–62. doi: [10.1001/archsurg.2010.292](https://doi.org/10.1001/archsurg.2010.292) PMID: [21242446](https://pubmed.ncbi.nlm.nih.gov/21242446/)
18. Roh MS, Jeon HJ, Kim H, Han SK, Hahm BJ. The prevalence and impact of depression among medical students: a nationwide cross-sectional study in South Korea. *Acad Med*. 2010 Aug; 85(8):1384–90. doi: [10.1097/ACM.0b013e3181df5e43](https://doi.org/10.1097/ACM.0b013e3181df5e43) PMID: [20453812](https://pubmed.ncbi.nlm.nih.gov/20453812/)
19. Joules N, Williams DM, Thompson AW. Depression in Resident Physicians: A Systematic Review. *Open Journal of Depression* Vol. 3 No.3, August 2014.
20. Gulliver Amelia, Griffiths Kathleen M, and Helen Christensen. Barriers and facilitators to mental health help-seeking for young elite athletes: a qualitative study. *BMC Psychiatry*. 2012; 12: 157. PMID: [PMC3514142](https://pubmed.ncbi.nlm.nih.gov/PMC3514142/). doi: [10.1186/1471-244X-12-157](https://doi.org/10.1186/1471-244X-12-157)
21. Guille C, Speller H, Laff R, Epperson CN, Sen S. Utilization and barriers to mental health services among depressed medical interns: a prospective multisite study. *J Grad Med Educ*. 2010 Jun; 2(2):210–4. doi: [10.4300/JGME-D-09-00086.1](https://doi.org/10.4300/JGME-D-09-00086.1) PMID: [21975622](https://pubmed.ncbi.nlm.nih.gov/21975622/)
22. Rose Mary, Manser Thomas, J Catesby Ware. Effects of call on sleep and mood in internal medicine residents. *Behav Sleep Med* 2008; 6(2):75–88. doi: [10.1080/15402000801952914](https://doi.org/10.1080/15402000801952914) PMID: [18443947](https://pubmed.ncbi.nlm.nih.gov/18443947/)
